# Supplementary material
Source: PubMed Central journal article supplement (PMC7472713)
Supplement: bloodBLD2020005348-suppl1.pdf [file bloodBLD2020005348-suppl1.pdf]

## **Supplemental Data**

# **Talin1 is the Principal Platelet Rap1 Effector of Integrin Activation**

### **Supplemental Methods**

#### ***Tln1* mutagenesis using CRISPR-Cas9**

The sgRNA and the ssODN were from IDT. Cas9 mRNA/sgRNA/tracrRNA (3  $\mu$ M) was mixed with ssODN (5 ng/ $\mu$ l) and injected into the pronuclei of B6SJLF2 embryos that were obtained through in vitro fertilization of wildtype oocytes by sperm from *Tln1*<sup>WT/R35E</sup> donor mice. Surviving embryos were implanted into ICR pseudo-pregnant females and pregnancies went to full term. Tissue biopsies for genomic DNA were taken from pups between 7-10 days. Mice were genotyped by PCR using forward primers 5'-CACTTCGGTGAGGGTGTATTCTA-3' and reverse primers 5'-GTGATACCTGGGGAAAAGG GATG-3' followed by Sanger sequencing using forward primers 5'-CGGTGAGGGTGTATTCTAATG-3' for R35E mutation and 5'-CATGCTCTATGTGCTGTCTC-3' for R118E mutation.

#### **Reagents and antibodies**

Prostacylin (PGI<sub>2</sub>) and ADP were from Sigma-Aldrich. Protease-activated receptor 4-activating peptide (PAR4-AP, AYPGKF-NH<sub>2</sub>) was from GenScript. Convulxin was from Enzo Life Sciences. Fibrillar collagen type I was from Chrono-log. Monoclonal antibodies directed against GPIX (Xia.B4) or activated murine  $\alpha$ IIb $\beta$ 3 (JonA/PE) were from Emfret Analytics. 9EG7 antibody was coupled with Alexa Fluor 488 using Alexa Fluor 488 Antibody Labeling kit (Life Technologies). PE-conjugated antibodies against CD41 (MWReg30; control isotype RTK2071), CD61 (2C9.G2; control isotype HTK888), CD29 (HM $\beta$ 1-1; control isotype HTK888), CD49b (HM $\alpha$ 2; control isotype HTK888) and CD49e (HM $\alpha$ 5-1; control isotype HTK888) were from Biolegend. FITC-

conjugated antibody against P-selectin (CD62P, RB40.34; control isotype A110-1) was from BD Biosciences.

### **Blood counts**

Peripheral blood was collected from the retro-orbital plexus and transferred to tubes containing K<sup>+</sup>.EDTA. Cell counts were performed using a Hemavet 950FS Hematology System programmed with mouse-specific settings (Drew Scientific). All samples were tested in duplicate, and the mean for each animal was plotted.

### **Western blotting**

Washed platelets were pelleted by centrifugation at 700 g for 5 min at room temperature and then lysed in Laemmli sample buffer. Lysates were subjected to a 4-20% gradient SDS-PAGE. Antibody directed against talin1 (8d4) was from Novus Biologicals. Antibody against  $\beta$ -actin (AC-15) was from Sigma-Aldrich. The appropriate IRDye/Alexa Fluor-coupled secondary antibodies were from LI-COR. Nitrocellulose membranes were scanned using an Odyssey CLx infrared imaging system (LI-COR) and blots were processed using Image Studio Lite software (LI-COR).

| Off-target sequences                                                   | Position                        | Location                   | CFD scores | MIT scores | PCR oligo sequences 5' > 3'                                     |
|------------------------------------------------------------------------|---------------------------------|----------------------------|------------|------------|-----------------------------------------------------------------|
| <b>gRNA1: ATGACCATTGTGCCCGAAT / TGG</b>                                | <b>chr4:43555934-43555856:+</b> | <b>Exon:Tln1</b>           | <b>97</b>  | <b>95</b>  |                                                                 |
| AAGACCC <b>T</b> CTGTGCC <b>AA</b> AT / CGG                            | chr2:174822060-174822082:+      | Intergenic:Edn3-Gm14617    | 0.318935   | 0.25       | F: ATGGTTGGTGCGAATAGGAAGTAGG<br>R: GAATTAGCAGAAGTCGGCAGCTAGG    |
| ATGA <b>A</b> CATT <b>C</b> ATGCC <b>AA</b> AT / CGG                   | chr17:69237876-69237898:+       | Intron:Epb4.113            | 0.284444   | 0.30       | F: GTGGCTTAGTTGTGGGTGAATCTCT<br>R: GTTGAAACTGGTCAGTGAGTGTCAG    |
| <b>G</b> TGACCATT <b>T</b> CTGCC <b>AA</b> TT / AGG                    | chr2:119692094-119692116:+      | Exon:Rtf1                  | 0.215385   | 0.11       | F: CATGAAGCAGATTCCCTTTGCATCC<br>R: ACTAACGCTTGGCCCTTCTAAAACA    |
| ATGA <b>G</b> GGTTTGTGCC <b>AG</b> AAT / GGG                           | chr10:60359473-60359495:+       | Intron:4632428N05Rik       | 0.211765   | 0.10       | F: CCCAGAGAGAACCCTTATGGGTGAG<br>R: AGAAATAGCAGTTTCCCGAGACAGG    |
| ATG <b>C</b> CA <b>C</b> T <b>G</b> TGCC <b>AG</b> AAT / AGG           | chr4:29493944-29493966:-        | Intergenic:Gm11923-Gm11925 | 0.176471   | 0.24       | F: GCTTTTACGGTGATACAGAAGACCG<br>R: CCATCCCAAATTGACTTTCCAAATGA   |
| <b>gRNA2: CTTACCAATTCGGGCACAAA / TGG</b>                               | <b>chr4:43555938-43555860:-</b> | <b>Exon:Tln1</b>           | <b>97</b>  | <b>90</b>  |                                                                 |
| <b>T</b> TT <b>A</b> GA <b>A</b> ATTCGGAC <b>CA</b> AAA / TGG          | chr17:65378775-65378797:+       | Intron:Tmem232             | 0.417857   | 0.14       | F: CAGCTGTGAACCCCTTATGCAAGTCA<br>R: GGGAGGGTCTTCTGAGTTAGTGGA    |
| <b>G</b> TTACT <b>T</b> ATTC <b>A</b> GGC <b>CA</b> AAA / TGG          | chr1:61804468-61804490:-        | Intron:4930448K12Rik       | 0.346196   | 0.29       | F: TGGGTGACCTCTGTCATCACTGAAT<br>R: TATGTCTGTAAGACTGGCCCTCGT     |
| <b>A</b> TTAC <b>CA</b> AT <b>T</b> GGGC <b>CA</b> AAA / AGG           | chr13:55268370-55268392:+       | Intron:Nsd1                | 0.307692   | 4.79       | F: CAGTCAGTGTAGTCCTTGGTTTTTGT<br>R: GGAACCTGATTTTACAACCTGGCCCAA |
| <b>G</b> TT <b>A</b> GC <b>AA</b> GT <b>A</b> GGGC <b>CA</b> AAA / TGG | chr7:67494388-67494410:-        | Intergenic:Mef2a-Lrrc28    | 0.254348   | 0.49       | F: AAAGCCTCAACGATCCTCTTCTCTG<br>R: GTCCTAAAGCACTGTCATCTGGTCCG   |
| CTTAC <b>CA</b> GT <b>A</b> GG <b>A</b> CACT <b>AA</b> / AGG           | chr14:83619776-83619798:+       | Intergenic:Gm24774-Podh17  | 0.20625    | 0.02       | F: AGCAACAATGGCAAATCAACATCCT<br>R: ATCTCACTTCTGATCCCGGTGTTA     |

**Supplemental Table 1. List of potential CRISPR-Cas9 off-target sites.** Top five off-target sequences for each gRNA utilized to generate both Tln1-R118E and Tln1-R35E,R118E mice. Matches are ranked by CFD (Cutting Frequency Determination, from *Doench et al. Nature Biotechnology* 34, 184-191 (2016)) off-target score from most to least likely. The higher the CFD specificity score, the lower are off-target effects in the genome. Mismatches between off-target sites and gRNA sequences are indicated in red. DNA oligos used for PCR and Sanger sequencing are listed for each off-target sequence.

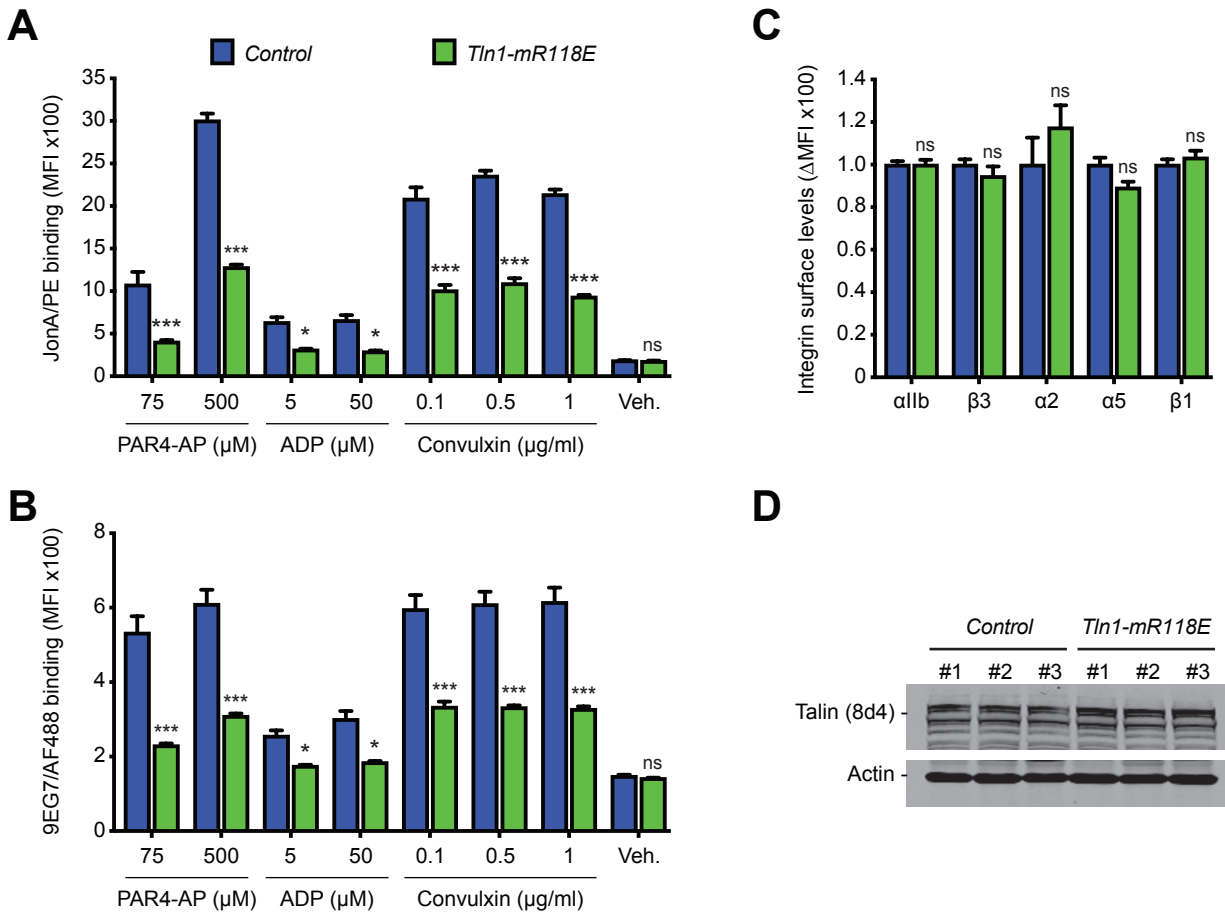

**Supplemental Figure 1. Characterization of integrin activation, integrin surface levels and talin1 expression in Tln1-mR118E platelets.** (A-B) Impaired  $\alpha$ IIb $\beta$ 3 integrin activation in Tln1-mR118E platelets. Flow cytometry assay to measure binding of GPIX-labeled platelets in whole blood to (A) JonA/PE antibody or (B) Alexa-Fluor 488 coupled 9EG7 antibody in response to agonist stimulation. Bar graphs represent MFI  $\pm$  SEM (n = 6 mice, representative of  $\geq$  3 independent experiments). Two-way ANOVA with Tukey post-test; ns, not significant; \*, p<0.05; \*\*\*, p<0.001. (C) Surface expression of  $\alpha$ IIb,  $\beta$ 3,  $\alpha$ 2,  $\alpha$ 5 and  $\beta$ 1 integrins in Tln1-mR35E,R118E platelets was measured by flow cytometry. Bar graph represents MFI  $\pm$  SEM (n = 6 mice). Two tailed *t*-test. ns, not significant. (D) Expression of talin1 mutant in Tln1-mR118E platelets was assayed by Western blotting. Results are representative of 3 independent experiments, n = 3 mice each time.

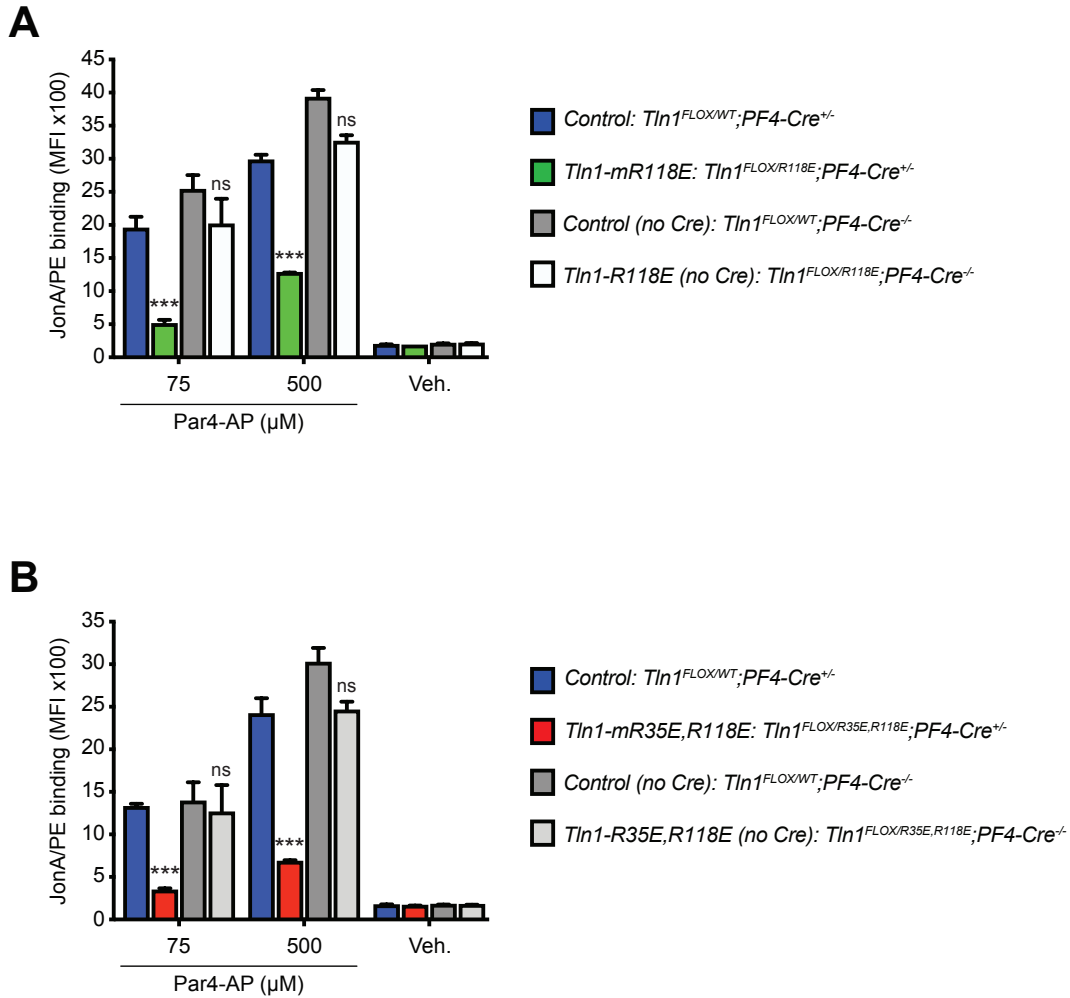

**Supplemental Figure 2. Functional analysis to rule out potential CRISPR/Cas9 off-target effects on integrin activation in *Tln1-mR118E* and *Tln1-mR35E,R118E* platelets.** Flow cytometry assay to measure binding of GPIX-labeled platelets in whole blood to JonA/PE antibody in response to PAR4-AP stimulation. Reduction in  $\alpha$ IIB $\beta$ 3 integrin activation in (A) *Tln1-mR118E* and (B) *Tln1-mR35E,R118E* platelets was only observed in the presence of PF4-Cre. Bar graphs represent MFI  $\pm$  SEM ( $n = 6$  mice, representative of  $\geq 3$  independent experiments). Two-way ANOVA with Tukey post-test. ns, not significant; \*\*\*,  $p < 0.001$ .
