# Supplementary material
Source: PubMed Central journal article supplement (PMC7472713)
Supplement: bloodBLD2020005348-suppl2.pdf [file bloodBLD2020005348-suppl2.pdf]

# Table S1

|               | Off-target sequences              | Position                        | Location                   | CFD scores | MIT scores | PCR oligo sequences 5' > 3'                                   |
|---------------|-----------------------------------|---------------------------------|----------------------------|------------|------------|---------------------------------------------------------------|
| <b>gRNA1:</b> | <b>ATGACCATTGTGCCCGAAT / TGG</b>  | <b>chr4:43555934-43555856:+</b> | <b>Exon:Tln1</b>           | <b>97</b>  | <b>95</b>  |                                                               |
|               | AAGACCTCTGTGCCCAAT / CGG          | chr2:174822060-174822082:+      | Intergenic:Edn3-Gm14617    | 0.318935   | 0.25       | F: ATGGTTGGTGCCAATAGGAAGTAGG<br>R: GAATTAGCAGAAGTCGGCAGCTAGG  |
|               | ATGAACATTATGCCCAAT / CGG          | chr17:69237876-69237898:+       | Intron:Epb4.113            | 0.284444   | 0.30       | F: GTGGCTTAGTTGTGGGTGAATCTCT<br>R: GTTGAAACTGGTCAGTGAGTGTGAG  |
|               | GTGACCATTCTGCCCAATT / AGG         | chr2:119692094-119692116:+      | Exon:Rtf1                  | 0.215385   | 0.11       | F: CATGAAGCAGATTCCCTTTGCATCC<br>R: ACTAACGCTTGGCCCTTCTAAAAACA |
|               | ATGAGGGTTTGTGCCAGAAT / GGG        | chr10:60359473-60359495:+       | Intron:4632428N05Rik       | 0.211765   | 0.10       | F: CCCAGAGAGAAACCTTATGGGTGAG<br>R: AGAAATAGCAGTTTGCCGAGACAGG  |
|               | ATGCCCACTGGTGCCAAGAAT / AGG       | chr4:29493944-29493966:-        | Intergenic:Gm11923-Gm11925 | 0.176471   | 0.24       | F: GCTTTTACGGTGATACAGAAGAGCG<br>R: CCATCCCAAATTGACTTTCCAAATGA |
| <b>gRNA2:</b> | <b>CTTACCAATTCGGGCACAAA / TGG</b> | <b>chr4:43555938-43555860:-</b> | <b>Exon:Tln1</b>           | <b>97</b>  | <b>90</b>  |                                                               |
|               | TTTAGAAATTCGGACACAAA / TGG        | chr17:65378775-65378797:+       | Intron:Tmem232             | 0.417857   | 0.14       | F: CAGCTGTGAACCCCTTATGCAAGTCA<br>R: GGGAGGGTGCTTCTGAGTTAGTGGA |
|               | GTTACTTATTCAGGCACAAA / TGG        | chr1:61804468-61804490:-        | Intron:4930448K12Rik       | 0.346196   | 0.29       | F: TGCCTGACCTCTGTCATCACTGAAT<br>R: TATGTCTGTAAGACTGCCCCCTCGT  |
|               | ATTACCAATTTGGGCACAAA / AGG        | chr13:55268370-55268392:+       | Intron:Nsd1                | 0.307692   | 4.79       | F: CAGTCAGTGTAGTCCTTGGTTTTTGT<br>R: GGAAGTATTTTACAACCTGGCCCAA |
|               | GTTAGCAAGTAGGGCACAAA / TGG        | chr7:67494388-67494410:-        | Intergenic:Mef2a-Lrrc28    | 0.254348   | 0.49       | F: AAAGCCTCAACGATCCTCTTCTCTG<br>R: GTCCTAAAGCACTGTCATCTGGTGC  |
|               | CTTACCAGTTAGGACACTAA / AGG        | chr14:83619776-83619798:+       | Intergenic:Gm24774-Pcdh17  | 0.20625    | 0.02       | F: AGCAACAATGGCAAATCAACATCCT<br>R: ATCTCACTTCTGATCCCGGTGTTA   |
